# Supplementary material for: Highly bright and stable white-light-emitting cadmium-free Ag,Mn co-doped Zn–In–S/ZnS quantum dots and their electroluminescence
Source: Royal Society of Chemistry journal article supplement (doi:10.1039/c8tc03742f), 2018-01-01
Supplement: c8tc03742f1.pdf [file c8tc03742f1.pdf]

## Supplementary Information for

### White-Light-Emitting Ag, Mn Co-Doped Zn-In-S/ZnS Quantum Dots with High Stability and Their Electroluminescence

Wen-Jin Zhang<sup>a</sup>, Chun-Yang Pan<sup>\*a</sup>, Fan Cao<sup>b</sup>, Haoran Wang<sup>b</sup> and Xuyong Yang<sup>\*b</sup>

<sup>a</sup> School of Chemical Engineering and Light Industry, Guangdong University of Technology, Guangzhou 510006, China

<sup>b</sup> Key Laboratory of Advanced Display and System Applications of Education of Ministry, Shanghai University, 149 Yanchang Road, Shanghai 200072, China

\* Corresponding Authors: panchuny@gdut.edu.cn; yangxy@shu.edu.cn

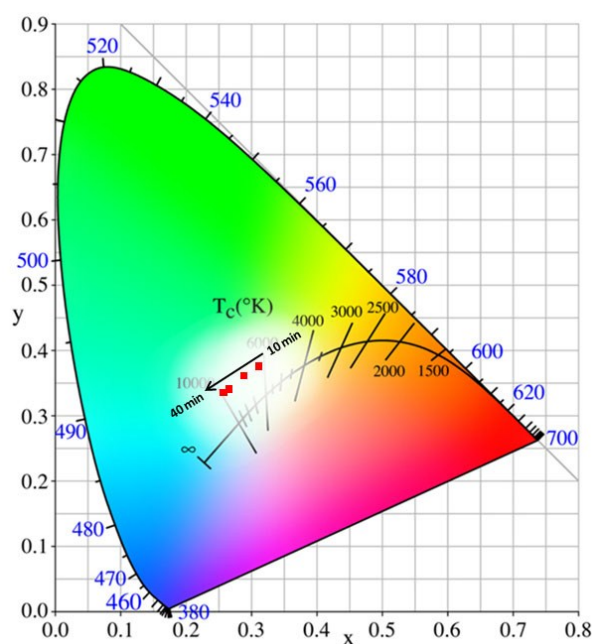

**Figure S1.** CIE coordinates of Ag, Mn: Zn-In-S QDs dispersed in chloroform solution with different reaction time (2.5% Ag and 1% Mn).

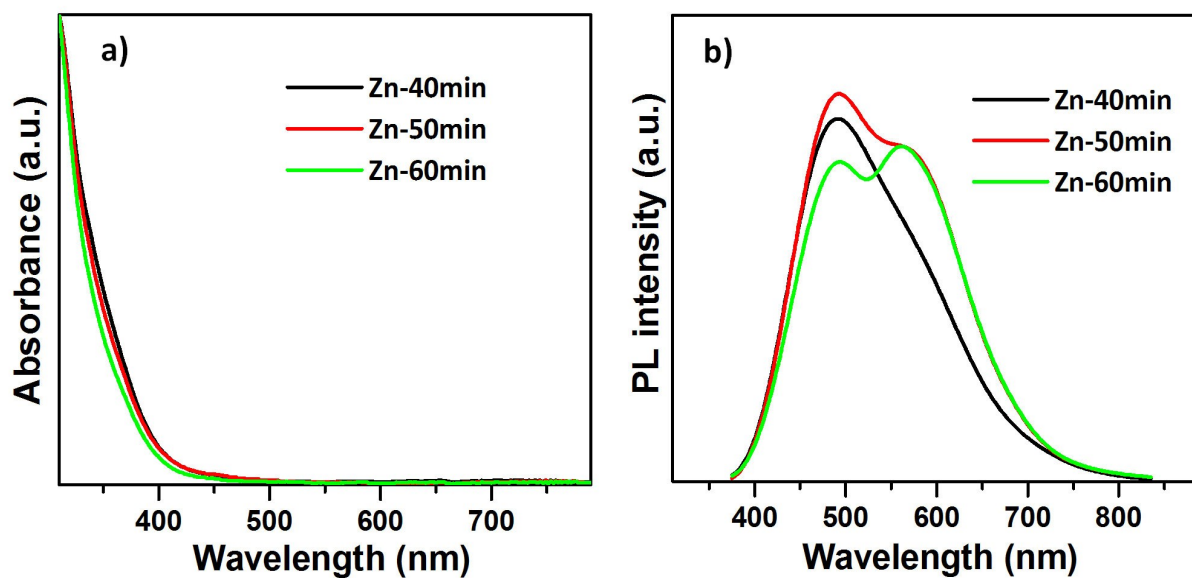

**Figure S2.** Temporal evolution of the (a) UV-vis absorption and (b) PL emission spectra of white-light-emitting Ag, Mn: Zn-In-S/ZnS QDs samples (2.5% Ag<sup>+</sup> and 1% Mn<sup>2+</sup>).

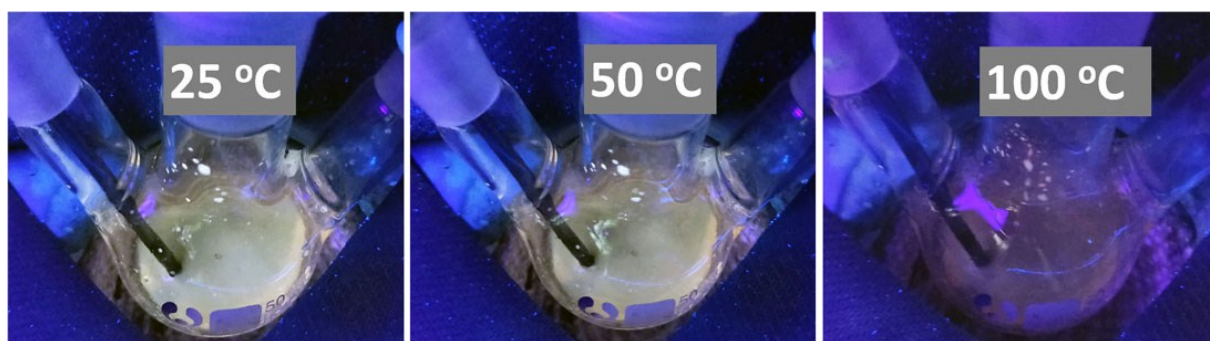

**Figure S3.** Digital pictures of Ag, Mn: Zn-In-S QDs under different heating temperature from 25 to 100 °C under illumination of a UV lamp at 365 nm.
